# Supplementary material for: A hybrid method for reconstructing the historical evolution of aerosol optical depth from sunshine duration measurements
Source: Copernicus journal article supplement (doi:10.5194/amt-13-3061-2020), 2020-06-11
Supplement: Supplementary file [file amt-13-3061-2020-supplement.pdf]

Supplement of Atmos. Meas. Tech., 13, 3061–3079, 2020  
<https://doi.org/10.5194/amt-13-3061-2020-supplement>  
© Author(s) 2020. This work is distributed under  
the Creative Commons Attribution 4.0 License.

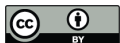

*Supplement of*

## **A hybrid method for reconstructing the historical evolution of aerosol optical depth from sunshine duration measurements**

**William Wandji Nyamsi et al.**

*Correspondence to:* William Wandji Nyamsi ([william.wandji@fmi.fi](mailto:william.wandji@fmi.fi))

The copyright of individual parts of the supplement might differ from the CC BY 4.0 License.

**Table S1.** Computed monthly burning thresholds for all stations

| Station name        | Burning threshold for each month |     |     |     |     |     |     |     |     |     |     |     |
|---------------------|----------------------------------|-----|-----|-----|-----|-----|-----|-----|-----|-----|-----|-----|
|                     | J                                | F   | M   | A   | M   | J   | J   | A   | S   | O   | N   | D   |
| Munich University   | 242                              | 174 | 155 | 157 | 194 | 189 | 203 | 184 | 138 | 127 | 208 | 208 |
| Ispra               | 543                              | 370 | 310 | 298 | 459 | 550 | 514 | 498 | 334 | 269 | 515 | 548 |
| Montsec             | 617                              | 429 | 399 | 436 | 441 | 420 | 446 | 305 | 384 | 421 | 801 | 672 |
| Valladolid          |                                  |     | 281 | 527 | 518 | 409 | 376 | 457 | 351 | 513 | 455 |     |
| Zaragoza            | 295                              | 235 |     |     |     | 290 | 259 | 260 | 315 | 251 | 254 | 554 |
| Barcelona           | 96                               | 57  | 386 | 333 | 320 | 345 | 312 | 269 | 392 | 330 | 87  | 126 |
| Palma de Mallorca   |                                  |     |     |     |     | 342 | 235 | 290 |     |     |     |     |
| Burjassot           | 276                              | 151 | 163 | 202 | 143 | 190 | 173 | 163 | 134 | 153 | 232 | 312 |
| Caceres             | 486                              | 466 | 380 | 350 | 275 | 251 | 263 | 265 | 403 | 438 | 510 | 552 |
| Badajoz             | 686                              | 339 | 413 | 248 | 231 | 191 | 227 | 237 | 293 | 348 | 405 | 638 |
| Murcia              | 317                              | 244 | 402 | 127 | 173 | 159 | 148 | 178 | 249 | 302 | 377 | 345 |
| Granada             | 469                              | 456 | 491 | 338 | 223 | 237 | 180 | 189 | 360 | 403 | 428 | 425 |
| El Arenosillo       | 391                              | 395 | 417 | 390 | 316 | 310 | 297 | 226 | 343 | 425 | 368 | 388 |
| Malaga              | 526                              | 408 | 406 | 352 | 322 | 280 | 283 | 289 | 311 | 355 | 450 | 526 |
| Santa Cruz Tenerife | 301                              | 398 | 296 | 344 | 196 | 158 | 142 | 151 | 155 | 151 | 178 | 462 |
| Izana               | 461                              | 443 | 463 | 408 | 431 | 256 | 93  | 83  | 230 | 469 | 423 | 453 |
